# Supplementary material for: trans-Platinum(ii) complex of 3-aminoflavone – synthesis, X-ray crystal structure and biological activities in vitro
Source: Royal Society of Chemistry journal article supplement (doi:10.1039/c4dt01501k), 2014-07-29
Supplement: c4dt01501k1.pdf [file c4dt01501k1.pdf]

| <b>Table S1.</b> Selected geometric parameters of the complex molecule [ $\text{\AA}$ , $^\circ$ ] |          |
|----------------------------------------------------------------------------------------------------|----------|
| <b>bond lengths</b>                                                                                |          |
| Pt(1)-N(3)                                                                                         | 2.064(5) |
| Pt(1)-Cl(1)                                                                                        | 2.298(1) |
| C(11)-C(2)                                                                                         | 1.479(8) |
| C(2)-C(3)                                                                                          | 1.355(8) |
| C(2)-O(1)                                                                                          | 1.366(7) |
| C(3)-N(3)                                                                                          | 1.443(7) |
| C(3)-C(4)                                                                                          | 1.451(8) |
| C(4)-O(4)                                                                                          | 1.231(7) |
| C(4)-C(10)                                                                                         | 1.460(8) |
| C(9)-O(1)                                                                                          | 1.374(7) |
| <b>valence angles</b>                                                                              |          |
| N(3)-Pt(1)-N(3) <sup>#</sup>                                                                       | 180.0    |
| N(3)-Pt(1)-Cl(1)                                                                                   | 92.7(1)  |
| Cl(1)-Pt(1)-Cl(1) <sup>#</sup>                                                                     | 180.0    |
| C(3)-C(2)-O(1)                                                                                     | 121.4(5) |
| C(3)-C(2)-C(11)                                                                                    | 127.3(5) |
| O(1)-C(2)-C(11)                                                                                    | 111.2(5) |
| C(2)-C(3)-N(3)                                                                                     | 122.0(5) |
| C(2)-C(3)-C(4)                                                                                     | 122.2(5) |
| N(3)-C(3)-C(4)                                                                                     | 115.7(5) |
| O(4)-C(4)-C(3)                                                                                     | 122.1(5) |
| O(4)-C(4)-C(10)                                                                                    | 123.0(5) |
| C(3)-C(4)-C(10)                                                                                    | 114.8(5) |
| C(9)-C(10)-C(4)                                                                                    | 119.6(5) |
| O(1)-C(9)-C(10)                                                                                    | 121.9(5) |
| C(3)-N(3)-Pt(1)                                                                                    | 121.7(4) |
| C(2)-O(1)-C(9)                                                                                     | 120.0(4) |
| <b>torsion angles</b>                                                                              |          |
| C(12)-C(11)-C(2)-C(3)                                                                              | -56.5(8) |
| O(1)-C(2)-C(3)-N(3)                                                                                | 174.3(5) |
| O(4)-C(4)-C(3)-N(3)                                                                                | 1.1(8)   |
| C(2)-C(3)-N(3)-Pt(1)                                                                               | 88.0(6)  |
| C(4)-C(3)-N(3)-Pt(1)                                                                               | -95.8(5) |
| C(3)-N(3)-Pt(1)-Cl(1)                                                                              | 27.3(4)  |
| Symmetry transformation code for equivalent atoms: <sup>#</sup> -x,-y+1,-z+1                       |          |

| <b>Table S2.</b> Hydrogen bonding geometry [ $\text{\AA}$ , $^\circ$ ]                                                 |                                     |                                       |                                       |                                   |
|------------------------------------------------------------------------------------------------------------------------|-------------------------------------|---------------------------------------|---------------------------------------|-----------------------------------|
| Scheme of hydrogen bond<br>D-H...A                                                                                     | d <sub>(D-H)</sub> [ $\text{\AA}$ ] | d <sub>(H...A)</sub> [ $\text{\AA}$ ] | d <sub>(D...A)</sub> [ $\text{\AA}$ ] | $\angle_{(D-H...A)}$ [ $^\circ$ ] |
| N(3)-H(3A)...O(4) <sup>i</sup>                                                                                         | 0.92                                | 2.00                                  | 2.868(6)                              | 155.7                             |
| C(15)-H(15)...O(4) <sup>ii</sup>                                                                                       | 0.95                                | 2.52                                  | 3.358(7)                              | 159.8                             |
| C(7)-H(7)...Cl(1) <sup>iii</sup>                                                                                       | 0.95                                | 2.88                                  | 3.604(7)                              | 133.4                             |
| Symmetry transformation codes: <sup>i</sup> : -x+1,-y+1,-z+1; <sup>ii</sup> : x-1,y+1,z; <sup>iii</sup> : -x+1,-y+1,-z |                                     |                                       |                                       |                                   |

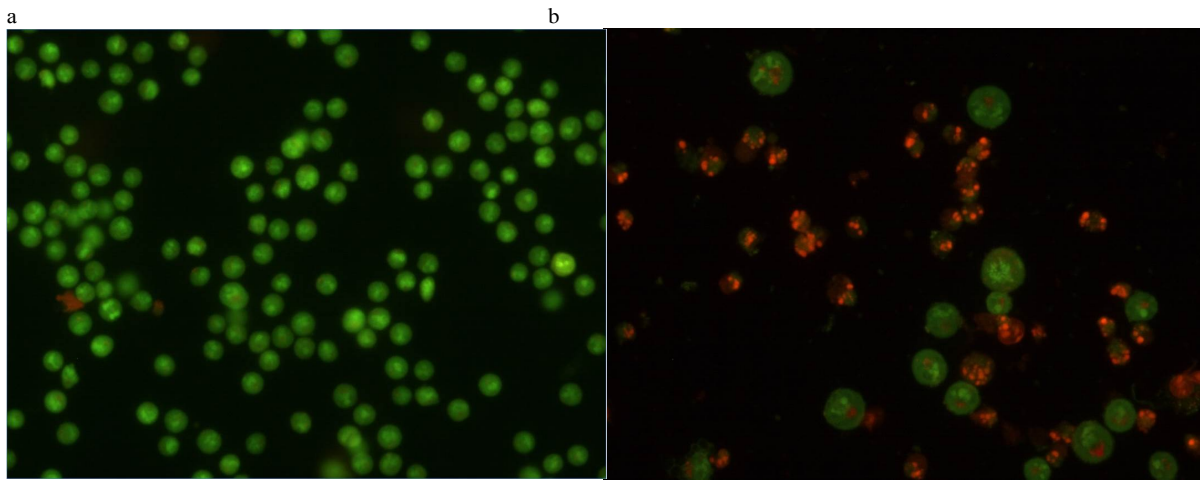

**Fig. S2** Examples of morphological appearance of apoptotic cells (b) and control cells (a) in L1210 cells treated with TCAP, stained with acridine orange and ethidium bromide.

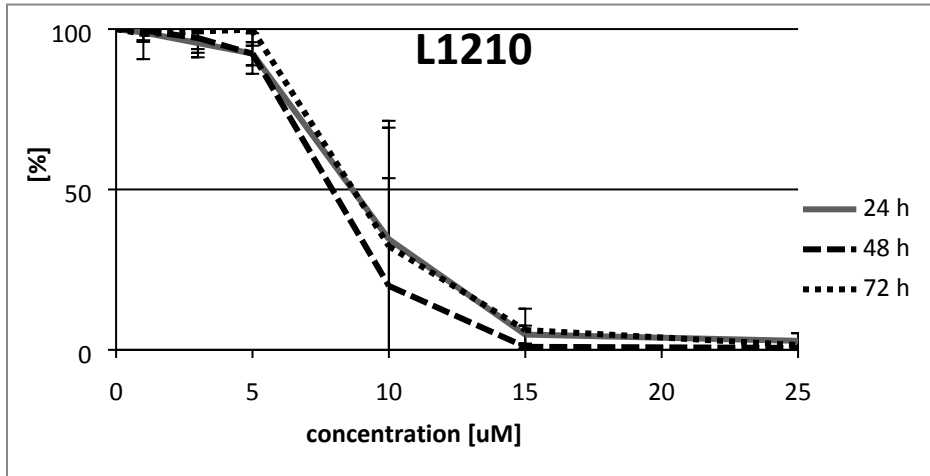

**Fig. S1** Decrease the viability of L1210 cells treated with TCAP after 24, 48 and 72h.

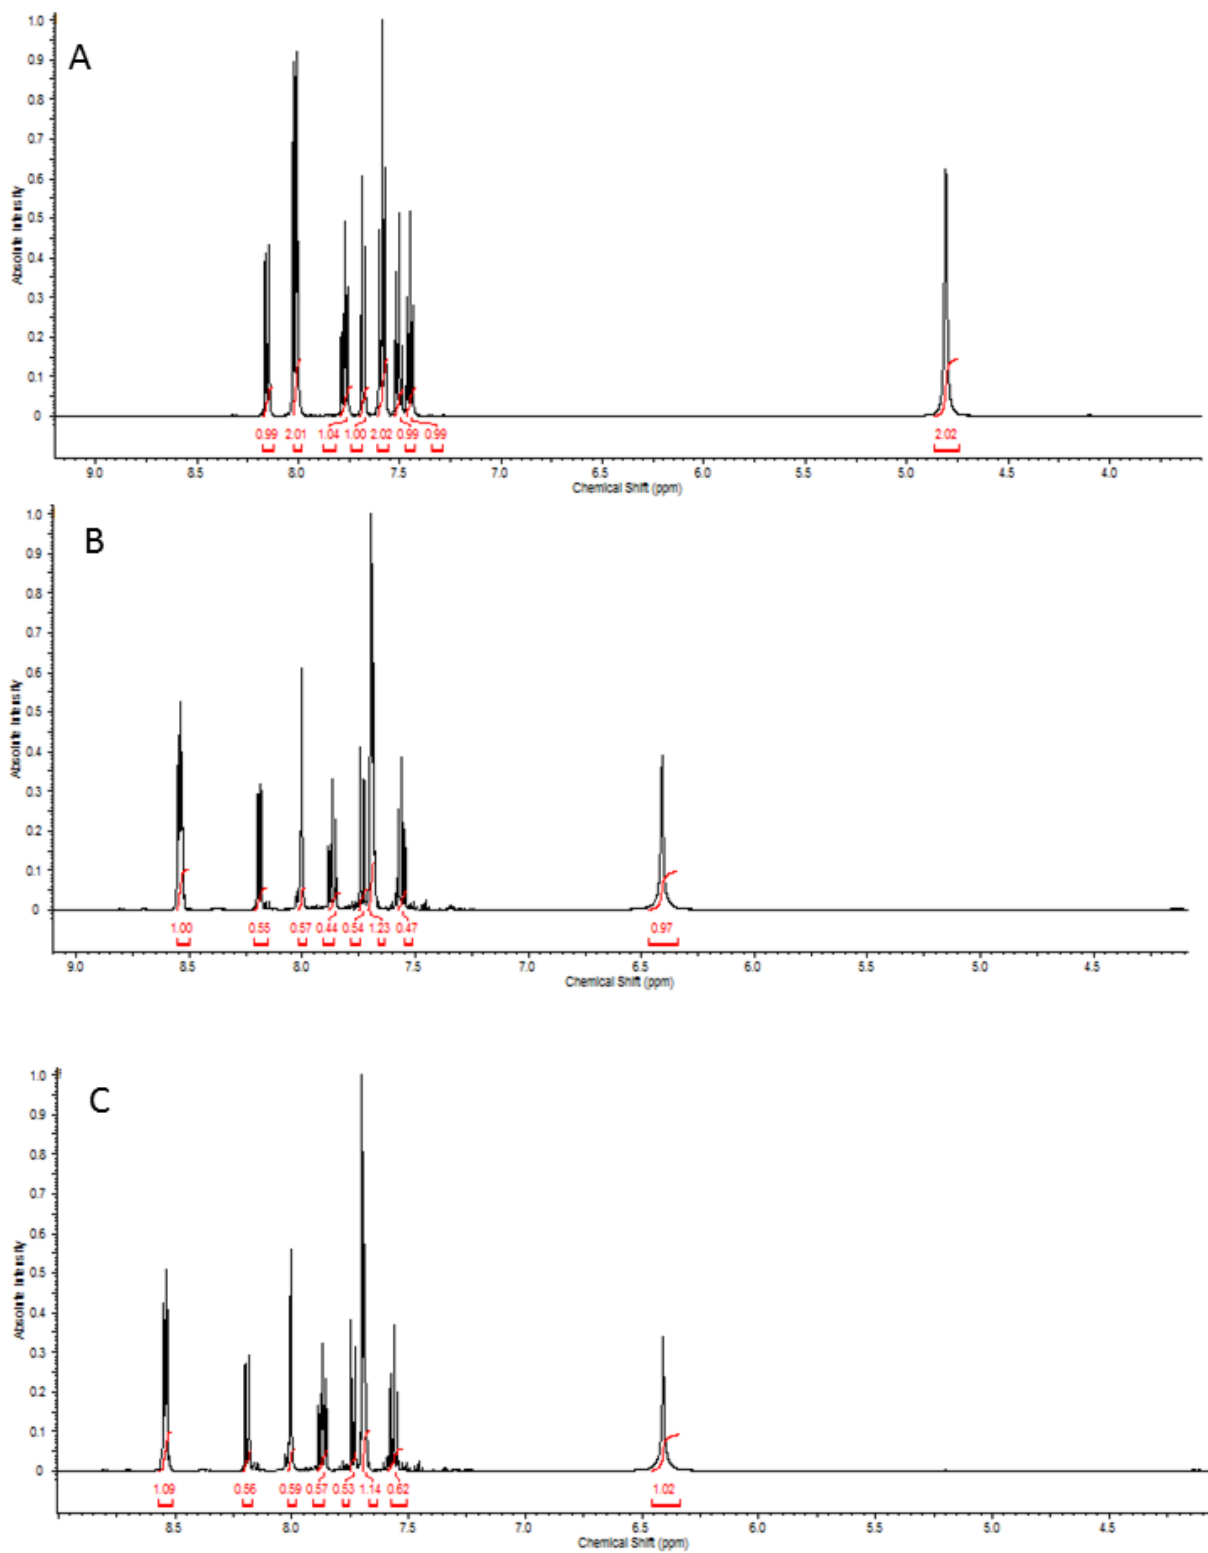

**Fig.S3**<sup>1</sup>H NMR spectra (DMF-d<sub>7</sub>): **A**-3-aminoflavone; **B**-*trans*-Pt(3-af)<sub>2</sub>Cl<sub>2</sub>; **C**- *trans*-Pt(3-af)<sub>2</sub>Cl<sub>2</sub> (after 24 h)

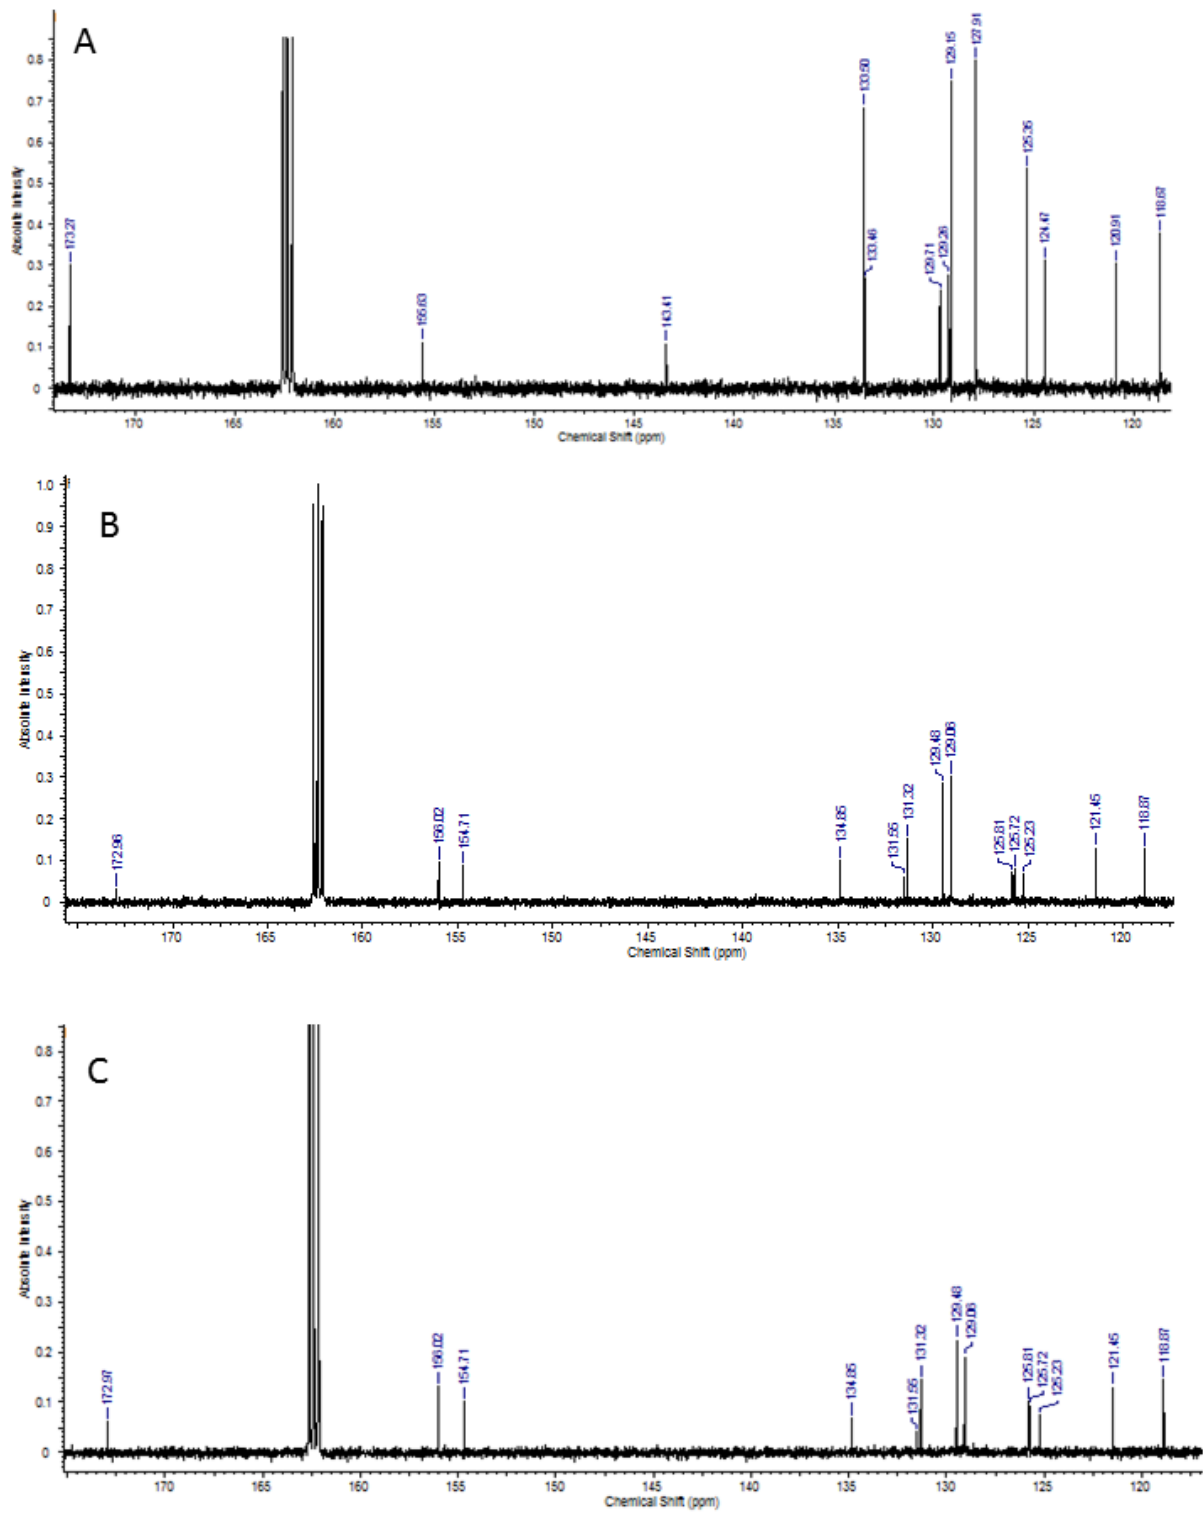

**Fig.S4** <sup>13</sup>C NMR spectra (DMF-d<sub>7</sub>): **A**-3-aminoflavone; **B**-*trans*-Pt(3-af)<sub>2</sub>Cl<sub>2</sub>; **C**- *trans*-Pt(3-af)<sub>2</sub>Cl<sub>2</sub> (after 24 h)
